# Supplementary material for: Strain-tunable magnetism and topological states in layered VBi2Te4
Source: Royal Society of Chemistry journal article supplement (doi:10.1039/d3cp03866a), 2023-01-01
Supplement: d3cp03866a1.pdf [file d3cp03866a1.pdf]

# Strain-tunable magnetism and topological states in layered **VBi<sub>2</sub>Te<sub>4</sub>**

Yaling Zhang<sup>a</sup>, Yingying Wang<sup>a</sup>, Wenjia Yang<sup>a</sup>, Huisheng Zhang<sup>\*a,b</sup>, and Jianfeng

Jia<sup>\*a</sup>

<sup>a</sup>*College of Chemistry and Materials Science, Key Laboratory of Magnetic Molecules and  
Magnetic Information Materials of Ministry of Education, Shanxi Normal University, Taiyuan  
030006, China*

<sup>b</sup>*College of Physics and Electronic Information, Shanxi Normal University, Taiyuan 030006,  
China*

*Email: hszhang@sxnu.edu.cn; jiajf@sxnu.edu.cn*

## Supplementary figures and captions

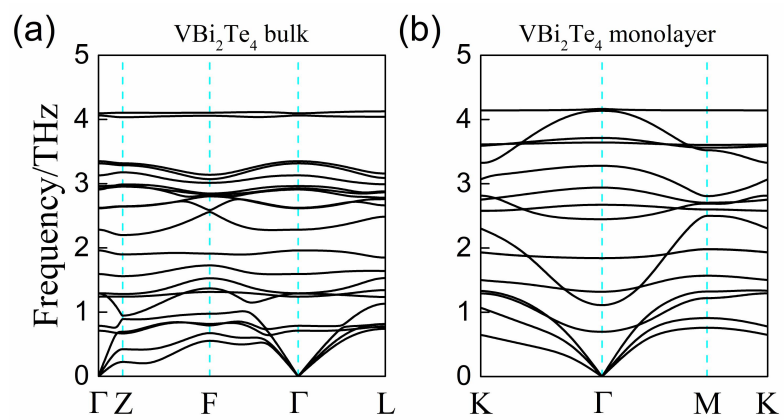

**Fig. S1** Calculated phonon spectra of bulk (a) and monolayered (b)  $\text{VBi}_2\text{Te}_4$  (VBT).

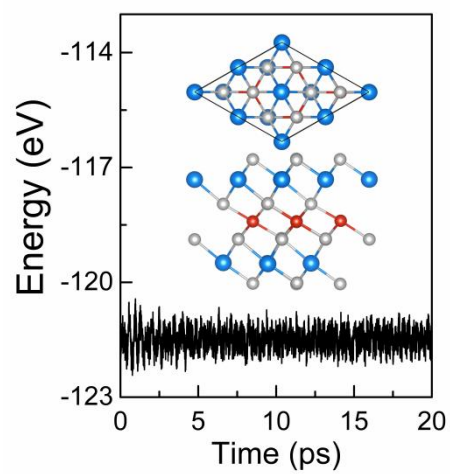

**Fig. S2** Ab initio molecular dynamics simulations of a VBT monolayer at 300 K. The insets display the final structure after 20 ps.

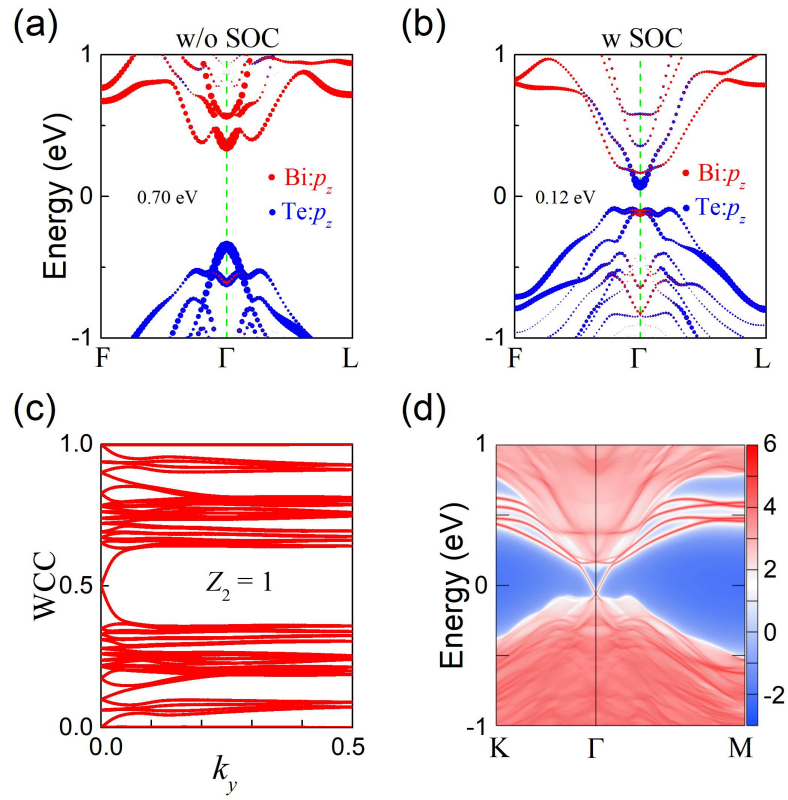

**Fig. S3** Band structures of antiferromagnetic VBT, without (a) and with spin-orbit (SOC). Here, the projected bands of Bi- $p_z$  and Te- $p_z$  are also given. (c) The corresponding  $Z_2$  invariant of  $k_3 = 0.0$  plane. (d) Calculated edge states.

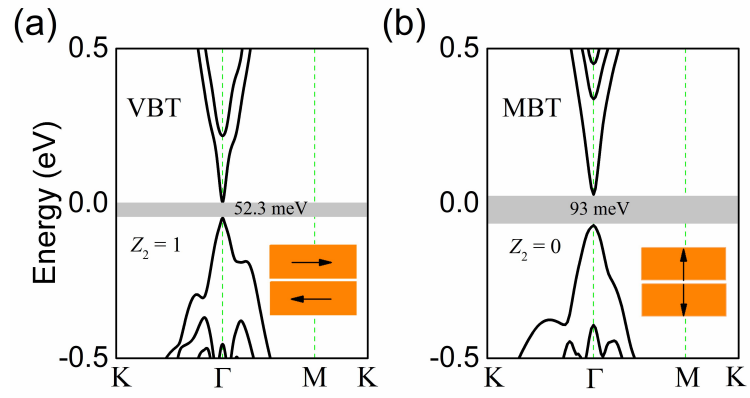

**Fig. S4** The electronic band structures of antiferromagnetic VBT (a) and  $\text{MnBi}_2\text{Te}_4$  (MBT) (b) calculated by HSE06 functional, respectively. Here, SOC is included, and the calculated  $Z_2$  invariant of  $\text{VBi}_2\text{Te}_4$  and  $\text{MnBi}_2\text{Te}_4$  respectively are 1 and 0.

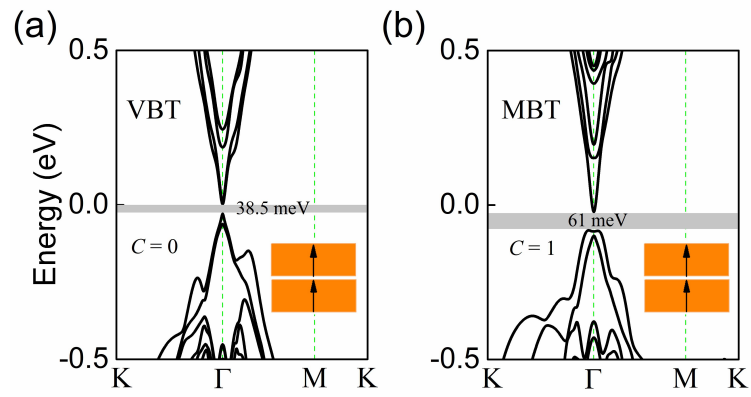

**Fig. S5** The electronic band structures of ferromagnetic VBT (a) and MBT (b) calculated by HSE06 functional, respectively. The calculated Chern number ( $C$ ) of VBT and MBT respectively are 0 and 1.

**Table S1** Calculated the magnetic anisotropy energy (MAE), nearest magnetic coupling parameter  $J_N$ , and estimated Curie temperature ( $T_c$ ) of VBT monolayer under strain. Here, “-” and “+” denote compressed and tensile strain, respectively. MAE is defined by  $MAE = E_{\perp} - E_{\parallel}$ , with  $E_{\perp}$  and  $E_{\parallel}$  denoting the total energies associated with the magnetic moment perpendicular and parallel to the plane of the 2D materials, respectively.

| VBT monolayer | MAE (meV) | $J_N$ (meV) | $T_c$ (K) |
|---------------|-----------|-------------|-----------|
| -5%           | 0.157     | -0.171      | 8         |
| -3%           | 0.115     | -0.354      | 13        |
| -1%           | 0.111     | -0.586      | 20        |
| 0             | 0.181     | -0.608      | 21        |
| +1%           | 0.118     | -0.795      | 26        |
| +3%           | 0.125     | -0.776      | 25        |
| +5%           | 0.130     | -0.819      | 28        |
